# Supplementary material for: Genetic Insulin Resistance Is a Potent Regulator of Gene Expression and Proliferation in Human iPS Cells
Source: Oxford University Press journal article supplement (doi:10.2337/db14-0109), 2014-07-25
Supplement: db140109supplementarydata.pdf [file db140109supplementarydata.pdf]

SUPPLEMENTARY DATA

**Supplementary Figure 1.** Quantification of western blot analysis of fibroblasts (related to Figure 1) (A-F) Quantification of western blot analysis for control and IR-Mut fibroblasts. Data are expressed as mean  $\pm$  SEM, relative to average of controls (n=2).

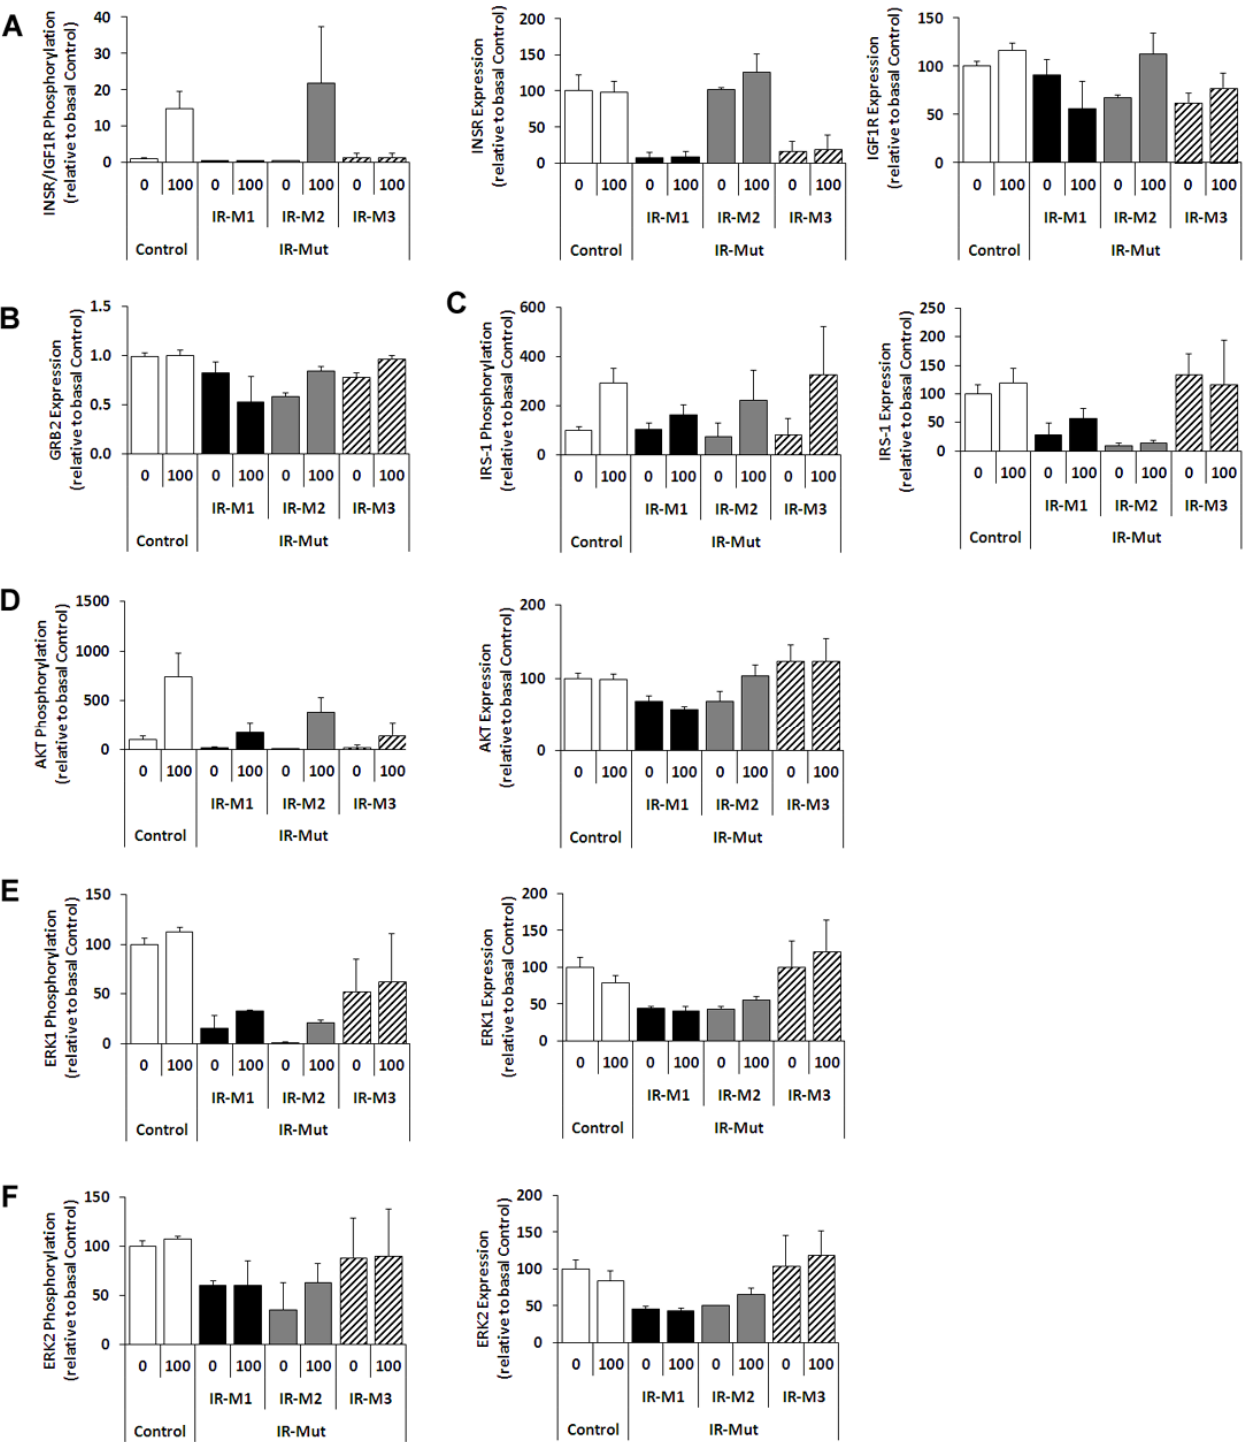

SUPPLEMENTARY DATA

**Supplementary Figure 2.** Pluripotency markers in control and IR-Mut iPSC (related to Figure 1)  
(A) Expression of nuclear NANOG, OCT4 and cytoplasmic SSEA4, TRA1-60 in iPSC . Images show merged colors between blue (Hoechst) and red (indicated protein). Scale bar represents 100  $\mu$ M.  
(B). Alkaline phosphatase activity was measured using a colorimetric kit. Images are representative of 3 wells.

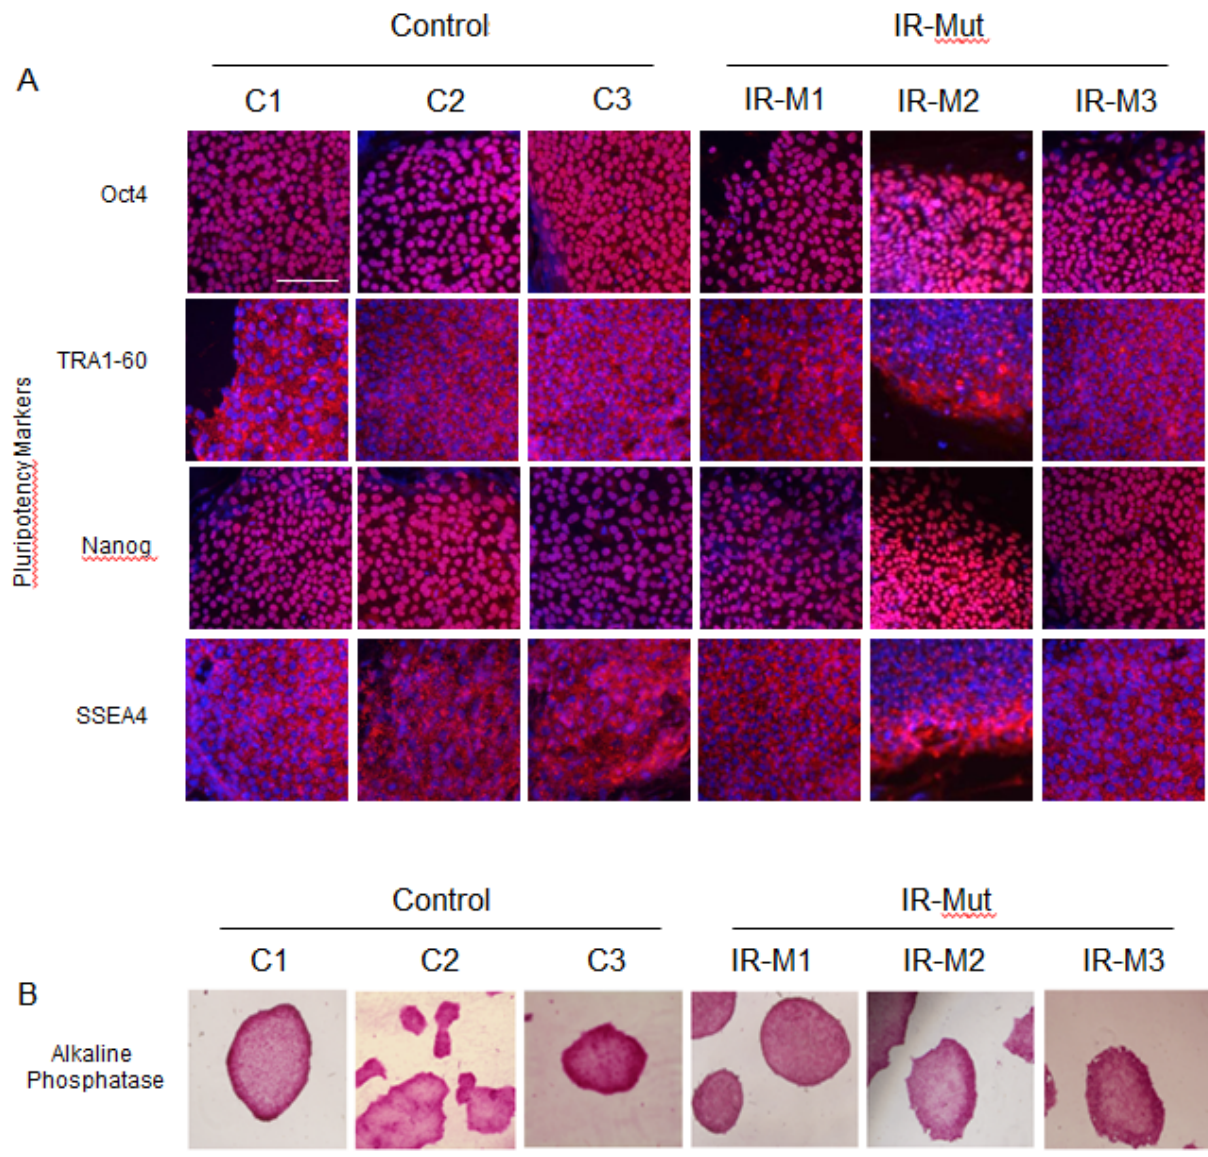

SUPPLEMENTARY DATA

**Supplementary Figure 3.** Teratoma formation and karyotyping of iPSC (related to Figure 1)  
(A) iPSC were injected into SCID mice for in vivo teratoma formation. All three germ layers were observed: ectoderm (pigmented cells and primitive neural tissue), mesoderm (cartilage and smooth muscle), and endoderm (primitive gut and respiratory tissue). Representative images are shown.  
(B) Karyotyping analysis revealed normal karyotype for all six iPS lines.

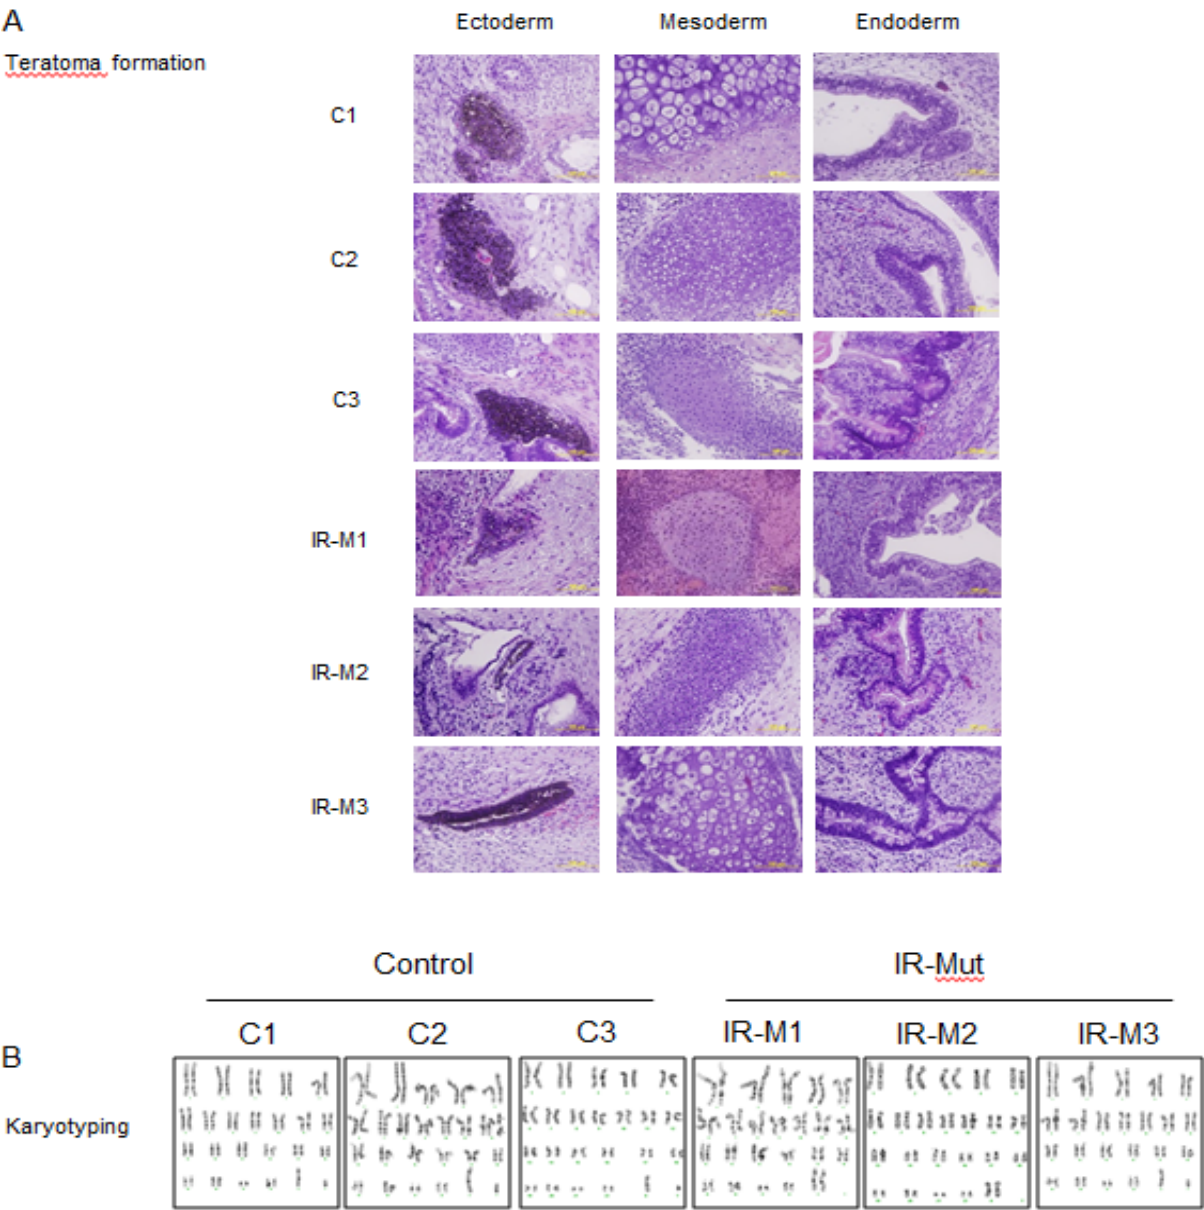

SUPPLEMENTARY DATA

**Supplementary Figure 4.** mRNA and protein expression key insulin signaling components in iPSC (related to Figure 2)

(A) iPSC were serum starved for 3 hours before 10-minute stimulation with 0, 10, or 100 nM insulin. Western blot for mature *INSR* and proreceptor expression, representative of 3 independent experiments.

(B) Quantification of western blot analysis for proreceptor expression. Data are expressed as the ratio of the expression of the proreceptor to the mature receptor (n=3).

(C) Quantification of western blot analysis for IGF1R expression. Data are expressed as percentage of the maximum value (n=3).

(D) mRNA expression for key insulin signaling molecules was analyzed by qRT-PCR using specific primers, as indicated. Data are expressed as fold change relative to the average of the control iPSC (n=3).

(E) iPSC were serum starved for 3 hours before 5-minute stimulation with 0 or 100 nM insulin. Immunoprecipitation of INSR using a  $\beta$ -subunit-specific anti-INSR antibody and immunoblotting with an anti-phospho INSR/IGF1R (left panel) and anti-INSR antibody (right panel) was performed. Representative blots are shown (n=2).

All values represent mean  $\pm$  SEM. \*  $p < 0.05$ .

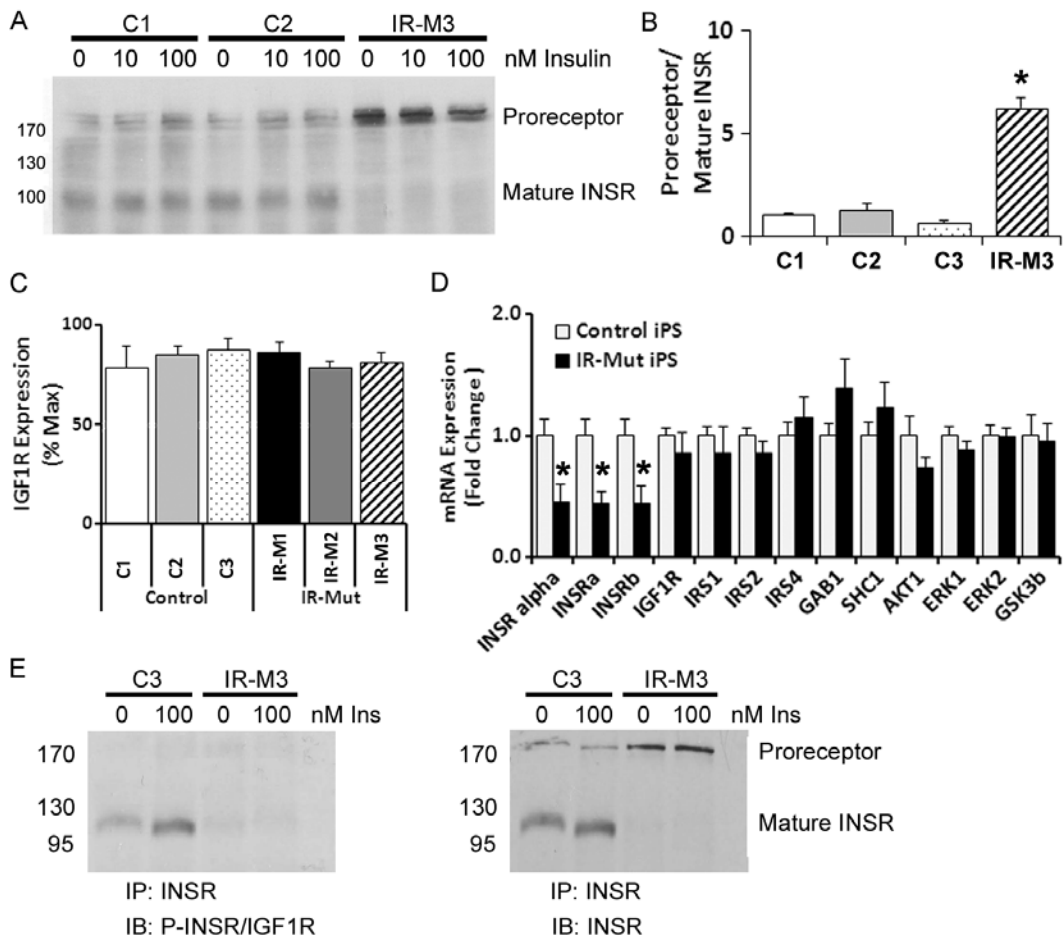

## SUPPLEMENTARY DATA

### Supplementary Figure 5. Quantification of ERK protein expression and relative phosphorylation (related to Figure 3)

Quantification of western blots for expression and phosphorylation of (A, C) ERK1 , and (B, D) ERK2 protein. Data are expressed as mean  $\pm$  SEM, relative to average of controls (n=3). \* p<0.05.

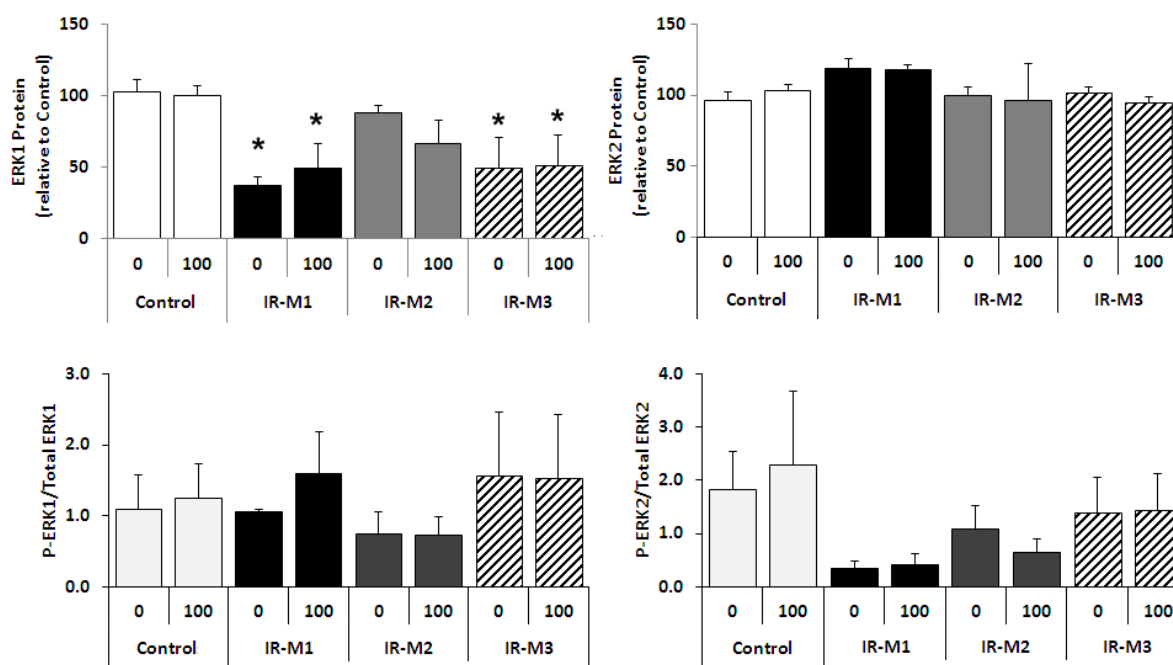

SUPPLEMENTARY DATA

**Supplementary Figure 6.** Attachment assay of iPSC (related to Figure 4)  
Attachment assay of iPSC; cells were plated onto matrigel-coated dishes and counted 1 hour post seeding by Nexcelom automatic cellometer.

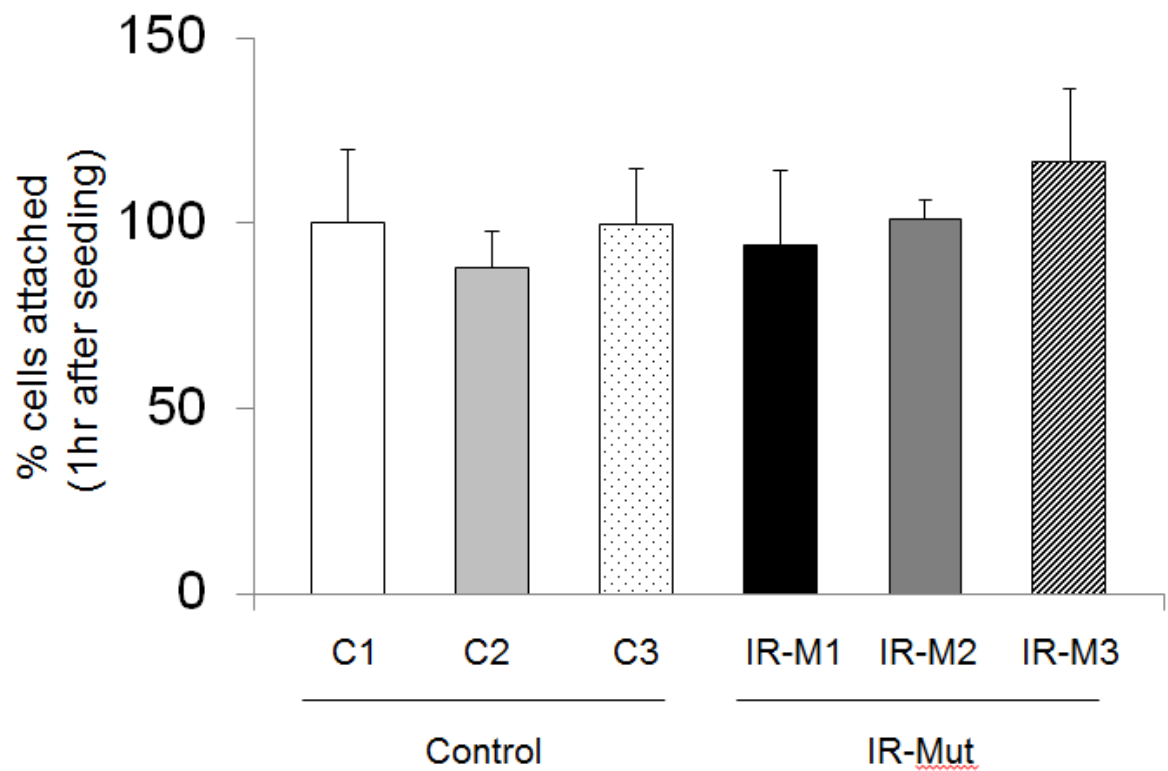



## SUPPLEMENTARY DATA

**Supplementary Table 1.** DAVID – pathway analysis of iPS- and fibroblasts-enriched gene groups (related to Figure 5)

DAVID pathway analysis of the top 100 mRNAs of iPS- and fibroblast-enriched groups ( $\log_2$  FC > or < 5). The table shows pathways significantly overrepresented ( $p < 0.001$ ,  $q < 0.001$ ), and indicates example of genes in the pathways and the percentage of differentially expressed genes found in each enriched pathway. Pathways common to the two groups are highlighted in bold.

### DAVID pathway analysis

| Pathway pattern in gene group | Pathway<br>$p < 0.001$ ; $q < 0.1$ | Example of genes in the pathway   | % of genes in the pathway |
|-------------------------------|------------------------------------|-----------------------------------|---------------------------|
| Fibroblasts-enriched          | <b>Glycoproteins</b>               | IGFBP3-6, FGF5, MMP1, ITGBL1      | 52%                       |
|                               | <b>Signaling pathways</b>          | FGF5-7, PDGFRA, LUM               | 49%                       |
|                               | Wound healing                      | FGF7, FN1, COL5A1, TIMP3          | 26%                       |
|                               | Extracellular matrix deposition    | TGFb1, COL3A1, PDGFRA             | 20%                       |
|                               | Collagen                           | COL6A3, COL12A1, COL1A1           | 7%                        |
| iPS-enriched                  | <b>Glycoproteins</b>               | TNC, FN1, COL12A1                 | 7%                        |
|                               | <b>Glycoproteins</b>               | IGFBP2, SEMA6A, EPCAM, GABRB3     | 37%                       |
|                               | <b>Signaling pathways</b>          | CXCL5, APOE, IGFBP2, TDGF3, NTS   | 33%                       |
|                               | Embryonic stem cells               | LIN28A-B, POU5F1, NANOG, ZIC2-5   | 33%                       |
|                               | Development                        | EPCAM, USP44, TDGF1               | 13%                       |
| Neurogenesis                  |                                    | APOE, SEMA6A, KIF5C, GABRB3, ANK3 | 13%                       |

**Bold:** common pathway

## SUPPLEMENTARY DATA

### Supplementary Table 2. Transcription factor motif analysis of iPS- and fibroblast-enriched gene groups (related to Figure 5)

We utilized the molecular signatures database (C3, GenePattern) to identify transcription factor binding site motifs over represented in putative 2 kb upstream promoters (enrichment threshold  $p < 0.001$ ) for the top 100 iPS- and fibroblast-enriched probes ( $\log_2 FC > \text{or} < 5$ ). Examples of genes responsible for the enrichment and the percentage of promoters with these motifs are provided. Putative regulatory transcription factors common to both fibroblast- and iPS-enriched gene groups are highlighted in bold.

### Transcription factor motif analysis -2000bpTSS

| TF pattern in gene group | TF motif $p < 0.001$   | Example of regulated genes         | % of genes regulated |
|--------------------------|------------------------|------------------------------------|----------------------|
| Fibroblasts-enriched     | <b>MLLT7 (FOXO4)**</b> | TFAP2A, TNFRSF19                   | 26%                  |
|                          | MAZ                    | MEIS1, SNAP25, PPARG, COL18A1      | 24%                  |
|                          | <b>LEF1*</b>           | SALL1, COL18A1, PPARG              | 21%                  |
|                          | TAF+                   | ABCA1, MEIS1, PAX3, SNAP25, PPARG  | 20%                  |
|                          | <b>NFAT/NFATC**</b>    | SNAP25, ALDH1A1, MEIS1             | 14%                  |
|                          | FOXA1**                | MEIS1, SNAP25, MAB21L1             | 13%                  |
|                          | GATA1+                 | ALDH1A1, ZFPM2                     | 10%                  |
| <u>iPS</u> -enriched     | <b>LEF1*</b>           | SALL2, ZIC3, SEMA6A                | 23%                  |
|                          | TCF3**                 | SEMA6A, ANK3, ZIC2-3, GPM6B, LRRN1 | 22%                  |
|                          | <b>MLLT7 (FOXO4)**</b> | NTS, ZIC2-5, FOXD3                 | 19%                  |
|                          | <b>NFAT/NFATC**</b>    | GPR98, ADCY2, USP44                | 15%                  |
|                          | PAX4**                 | ZIC2-5, SEMA6A, POU5F1, GPM6B      | 7%                   |
|                          | PUOF1F1+               | ZIC2-5, SEMA6A, OTX2, FOXD3, OTX2  | 6%                   |
|                          | MEIS1**                | OTX2, ZIC5, GCNT2, SCNN1A          | 5%                   |

\*TF involved in glucose homeostasis/insulin action

+TF involved in ES/iPSC physiology

Bold: shared transcription factor



## SUPPLEMENTARY DATA

### Supplementary Table 3. Transcription factor motif analysis of gene groups A and B (related to Figure 6)

Transcription factor motif analysis (C3, mSig database) analyzed putative promoter (2000 base pairs upstream the transcription start site) of top 100 statistically significant (nominal  $p < 0.05$ ) mRNAs of groups A and B. The table shows significant transcription factor motifs ( $p < 0.001$ ), example of regulated genes in the groups and the percentage of genes regulated by the transcription factor. Transcription factors found common between the two gene groups are highlighted in bold.

### Transcription factor motif analysis -2000bp TSS

| TF pattern in gene group | TF motif $p < 0.001$                                                                     | Example of regulated genes                                                                                                                                                                                                                                     | % of regulated genes                            |
|--------------------------|------------------------------------------------------------------------------------------|----------------------------------------------------------------------------------------------------------------------------------------------------------------------------------------------------------------------------------------------------------------|-------------------------------------------------|
| Group A                  | LEF1*<br>MYC*<br>E2F1*<br><b>FOXF2*</b>                                                  | CREB3L1, AP1S2, NEUROG3, PSMF1<br>NR4A3, ZNF565, ATP5F, ELK1, AP1S2<br>AP4M1, ZNF565, SLC12A5, KCNH5<br>AP4M1, KCNH5, NR4A3                                                                                                                                    | 13%<br>12%<br>10%<br>9%                         |
| Group B                  | SP1*<br>NFAT/NFATC**<br>JUN*<br><b>FOXF2*</b><br>NF1<br>CREB1*<br>GABPA/GABPA2*<br>ATF2* | CXCL14, AR, LEPR, EPN1, RASSF2<br>COL27A1, SLC38A2, HSD17B12<br>PTPRU, SLC38A1, CXCL14, COL27A1<br>ACSL1, EPN1, SLC38A2<br>IRS1, RAI14, CPEB4, C1QTNF1, PALM2<br>PTPRU, ASPHD1, SLC38A2, LMCD1<br>EPN1, CPEB4, PLA2G4D, ASPHD1<br>EPN1, PTPRU, PLA2G4D, ASPHD1 | 18%<br>14%<br>10%<br>9%<br>8%<br>7%<br>7%<br>7% |

\*TF involved in glucose homeostasis/insulin action

+TF involved in ES/iPSC physiology

Bold: shared transcription factor

# SUPPLEMENTARY DATA

**Supplementary Table 4.** DAVID pathway analysis of groups C, D, E, and F (related to Figure 7)  
Results of DAVID pathway analysis of probes from groups C, D, E, and F (all with log<sub>2</sub> FC > or < 1), including significantly enriched pathways (p<0.001, q<0.001), example genes, and the percentage of genes in the pathway. The pathways common to fibroblasts and iPS comparisons are highlighted in bold.

## DAVID pathway analysis

| Pathway pattern in gene group                                 | Pathway<br>p<0.001; q<0.1          | Example of genes in the pathway                                                        | % of genes in the pathway |
|---------------------------------------------------------------|------------------------------------|----------------------------------------------------------------------------------------|---------------------------|
| Groups C – D<br><br>(differentially expressed in fibroblasts) | <b>Glycoproteins</b>               | <b>BMP2, CDH13, HSD17B12, SERPINE1, PTPRG, IGF2, BMP6, FGFR2, ITGA7, PODXL, IGFBP3</b> | 39%                       |
|                                                               | <b>Signaling pathways</b>          | <b>RGS5, BMP2, CDH13, SERPINE1, PTPRG, FGFR2-3, COL15A1, IGF1</b>                      | 31%                       |
|                                                               | <b>Cell proliferation</b>          | <b>BMP2, CDH13, SERPINE1, IGF1, IRS1, KIT, VEGFA, IGFBP3</b>                           | 13%                       |
|                                                               | Development                        | HOXA5-13, PAX3, MEIS1, WNT7B, BMP6, VEGF                                               | 13%                       |
|                                                               | Extracellular matrix               | COLA1, TIMP3, VCAN, MMP3-11                                                            | 11%                       |
|                                                               | HOX/Homeobox protein               | HOXD8-11, HOXB2-8, MEIS1, HOXA1-13, HOXC6-11                                           | 10%                       |
|                                                               | Skeletal system development        | IGFBP3, BMP6, HOXD10-11, BMPR1B, BMP2, FGFR2, IGF1-2                                   | 9%                        |
|                                                               | Neuron development                 | NGF, CXCL12, RUNX3, PAX3, SEMA6A, HOXA1, HOXC10, SNAP25                                | 7%                        |
|                                                               | EGF signaling pathway              | EGF, EGFL6                                                                             | 5%                        |
|                                                               | Tyrosine kinase receptor signaling | FGFR2, KIT, IGFBP1, IRS1, IGF1-2, INS, IL6                                             | 4%                        |
| Groups E – F<br><br>(differentially expressed in iPS)         | <b>Glycoproteins</b>               | <b>BMP2, CDH13, HSD17B12, SERPINE1, SEMA6D, ABCG2, CD36</b>                            | 36%                       |
|                                                               | <b>Signaling pathways</b>          | <b>RGS5, BMP2, CDH13, SERPINE1, CXCL1, APOA2, GDF15</b>                                | 32%                       |
|                                                               | Regulation of transcription        | ZNF300-503-649, HMX2, NANOG, TFAP2B, TCEAL5                                            | 18%                       |
|                                                               | <b>Cell proliferation</b>          | <b>BMP2, CDH13, SERPINE1, RUNX2, CAV1-2, CXCL1, EDN1, MYOCD</b>                        | 16%                       |
|                                                               | DNA binding                        | HMX2, SIX6, ZNF300-503-649                                                             | 16%                       |

Bold: common pathway/gene

## SUPPLEMENTARY DATA

**Supplementary Table 5.** Transcription factor binding motif analysis of gene groups C, D and E, F (related to Figure 7)

Transcription factor motif analysis (mSig database) analyzed putative promoter (2000 base pairs upstream the transcription start site) of mRNAs of groups C, D and E, F (all with  $\log_2$  FC  $>$  or  $<$  1). The table shows significant motifs for transcription factors ( $p < 0.001$ ), example of regulated genes and the percentage of putative regulated genes that are recognized by the mSig database algorithm. Transcription factors found common between the two gene groups are highlighted in bold.

### Transcription factor motif analysis -2000bp TSS

| TF pattern in gene group                                      | TF motif $p < 0.001$                      | Example of regulated genes                                                                                                                                              | % of regulated genes |
|---------------------------------------------------------------|-------------------------------------------|-------------------------------------------------------------------------------------------------------------------------------------------------------------------------|----------------------|
| Groups C – D<br><br>(differentially expressed in fibroblasts) | <b>MLLT7 (FOXO4)**</b><br>TCF3**          | HOXB5, NCAM1, EGR2, MEIS1, IRS1, IGF1<br>GATA3, AP1S2, NCAM1, SNAP25, BMP6,<br>ITGA7, HOXA11, PAX3, PTPRB                                                               | 24%<br>21%           |
|                                                               | <b>NFAT/NFATC**</b><br>LEF1*              | <b>HSD17B12</b> , <b>BMP2</b> , GATA3, SOCS2, PDK4<br>IL11, RUNX3, PPARG, BMP6, PAX3, FGFR3,<br>IGFBP1                                                                  | 21%<br>20%           |
|                                                               | SP1*                                      | GATA3, AP1S2, NCAM1, HOXA1, SALL1,<br>EGR2, MEIS1, BMP2, SOCS2                                                                                                          | 18%                  |
|                                                               | <b>TAF+</b>                               | <b>SERPINE1</b> , SEMA7A, EGR2, IL11, NFIB                                                                                                                              | 17%                  |
|                                                               | <b>MAZ+</b>                               | HOXA1, ABCA1, IRS1, PPARG, BMP2                                                                                                                                         | 17%                  |
|                                                               | <b>REPIN1**</b>                           | <b>CDH13</b> , <b>SERPINE1</b> , AP1S2, SALL1, IL11                                                                                                                     | 15%                  |
|                                                               | FOXF2*                                    | PPA2B, PDK4, IGF1, HOXC6, HOXA7                                                                                                                                         | 13%                  |
|                                                               | JUN*                                      | IL11, BMP2, COL7A1, WNT7B, IL6                                                                                                                                          | 12%                  |
|                                                               | PAX4**                                    | SALL1, SEMA6A, HOXC6, IRS1, HOXB2,<br>HOXA5, IGF1                                                                                                                       | 12%                  |
|                                                               | <b>MYOD1</b><br>FOXA1**<br><b>MEF2A**</b> | <b>CDH13</b> , CADPS, CCND2, HOXC10, BMP6<br>IRS1, EGR2, SNAP25, PTPRG, IGF1, IGFBP1<br>AP1S2, HOXA1, IL11, EGR2, SOCS2, GK,<br>PPAP2B, ITGBL1, KIT, MYO1E, IGF1, FGFR2 | 10%<br>9%<br>8%      |
| Groups E – F<br><br>(differentially expressed in <u>iPS</u> ) | <b>MLLT7 (FOXO4)**</b><br><b>TAF+</b>     | MYOCD, CD36, RUNX2, CAV2,<br><b>SERPINE1</b> , EDN1, ACTA1, GDF15, ABCG2                                                                                                | 20%<br>19%           |
|                                                               | <b>NFAT/NFATC**</b>                       | <b>HSD17B12</b> , <b>BMP2</b> , TFAP2B, RBMS2, GDA                                                                                                                      | 14%                  |
|                                                               | <b>REPIN1**</b>                           | <b>CDH13</b> , <b>SERPINE1</b> , ACTA1, DTNA, ZNF503                                                                                                                    | 14%                  |
|                                                               | <b>MEF2A**</b>                            | MYOCD, EDN1, CTHRC1, RAB20, CXCL1                                                                                                                                       | 11%                  |
|                                                               | <b>MYOD1</b>                              | <b>CDH13</b> , ACTA1, ZNF503, CDH13, SOX15                                                                                                                              | 10%                  |
|                                                               | PITX2+                                    | MYOCD, SLC12A1, SOX15, NANOG                                                                                                                                            | 8%                   |
|                                                               | POU2F1**                                  | EDN1, NEDD9                                                                                                                                                             | 6%                   |
|                                                               | TEAD1/TEA1*                               | EDN1, ACTA1, CAV1, TNNT2                                                                                                                                                | 6%                   |
|                                                               | FOXJ1**                                   | CD36, NAV3, CYR61                                                                                                                                                       | 5%                   |
|                                                               | SRF*                                      | ACTA1, MYL7                                                                                                                                                             | 5%                   |

\*TF involved in glucose homeostasis/insulin action

+TF involved in ES/iPSC physiology

Bold: common transcription factor
